# Supplementary material
Source: PubMed Central journal article supplement (PMC8292223)
Supplement: NIHMS1708618-supplement-Lee_Supplementary_Information.pdf [file NIHMS1708618-supplement-Lee_Supplementary_Information.pdf]

**Supplementary Table 1. Amino acid sequence identity between AtINP1, AtINP2 and their respective orthologs from a variety of angiosperm taxa.**

| Species                 | Clade            | Sub Clade              | Sub clade      | Order            | Family             | INP1                            | INP2                            | INP1: identity to AtINP1 | INP2: identity to AtINP2 |
|-------------------------|------------------|------------------------|----------------|------------------|--------------------|---------------------------------|---------------------------------|--------------------------|--------------------------|
| Arabidopsis thaliana    | Eudicots         | Eurosids               | Malvids        | Brassicales      | Brassicaceae       | At4g22600                       | At1g15320                       | 100%                     | 100%                     |
| Arabidopsis lyrata      | Eudicots         | Eurosids               | Malvids        | Brassicales      | Brassicaceae       | XM_002867712                    | XM_002892814                    | 94%                      | 90%                      |
| Capsella rubella        | Eudicots         | Eurosids               | Malvids        | Brassicales      | Brassicaceae       | XM_006285378                    | XM_006303615                    | 92%                      | 90%                      |
| Eutrema salsugineum     | Eudicots         | Eurosids               | Malvids        | Brassicales      | Brassicaceae       | XM_006413577                    | XP_006416922                    | 84%                      | 82%                      |
| Tarenaya hassleriana    | Eudicots         | Eurosids               | Malvids        | Brassicales      | Cleomaceae         | XP_010539222                    | XP_010538005                    | 70%                      | 70%                      |
| Carica papaya           | Eudicots         | Eurosids               | Malvids        | Brassicales      | Caricaceae         | XM_022046188                    | XM_022042844                    | 56%                      | 44%                      |
| Theobroma cacao         | Eudicots         | Eurosids               | Malvids        | Malvales         | Malvaceae          | XP_007039914                    | XP_007023253                    | 54%                      | 47%                      |
| Gossypium raimondii     | Eudicots         | Eurosids               | Malvids        | Malvales         | Malvaceae          | XP_012471971                    | XP_012442564                    | 50%                      | 49%                      |
| Herrania umbratica      | Eudicots         | Eurosids               | Malvids        | Malvales         | Malvaceae          | XM_021435636                    | XM_021442724                    | 55%                      | 48%                      |
| Manihot esculenta       | Eudicots         | Eurosids               | Fabids         | Malpighiales     | Euphorbiaceae      | XP_021631264                    | Manes.04G112100                 | 54%                      | 45%                      |
| Ricinus communis        | Eudicots         | Eurosids               | Fabids         | Malpighiales     | Euphorbiaceae      | XP_002529792                    | XP_002517657                    | 53%                      | 45%                      |
| Hevea brasiliensis      | Eudicots         | Eurosids               | Fabids         | Malpighiales     | Euphorbiaceae      | XM_021805081                    | XM_021780609                    | 55%                      | 44%                      |
| Populus trichocarpa     | Eudicots         | Eurosids               | Fabids         | Malpighiales     | Salicaceae         | XM_024587580                    | XP_006369313                    | 52%                      | 52%                      |
| Linum usitatissimum     | Eudicots         | Eurosids               | Fabids         | Malpighiales     | Linaceae           | Lus10028923 (Phytosome)         | Lus10025746 (Phytosome)         | 49%                      | 38%                      |
| Citrus cinensis         | Eudicots         | Eurosids               | Fabids         | Sapindales       | Rutaceae           | XM_015529742                    | XP_015386244                    | 50%                      | 48%                      |
| Pistacia vera           | Eudicots         | Eurosids               | Fabids         | Sapindales       | Anacardiaceae      | XM_031405325                    | XM_031431563                    | 50%                      | 48%                      |
| Fragaria vesca          | Eudicots         | Eurosids               | Fabids         | Rosales          | Rosaceae           | XM_004300662                    | XP_004305502                    | 47%                      | 47%                      |
| Prunus persica          | Eudicots         | Eurosids               | Fabids         | Rosales          | Rosaceae           | XM_007210501                    | XP_020416177                    | 49%                      | 47%                      |
| Ziziphus jujuba         | Eudicots         | Eurosids               | Fabids         | Rosales          | Rhamnaceae         | XM_016045621                    | XP_015870799                    | 49%                      | 47%                      |
| Cannabis sativa         | Eudicots         | Eurosids               | Fabids         | Rosales          | Cannabaceae        | XM_030645895                    | XM_030632112                    | 51%                      | 48%                      |
| Quercus suber           | Eudicots         | Eurosids               | Fabids         | Fagales          | Fagaceae           | XM_024052895                    | XM_024036728                    | 50%                      | 45%                      |
| Juglans regia           | Eudicots         | Eurosids               | Fabids         | Fagales          | Juglandaceae       | XM_018992647                    | XP_018851749                    | 50%                      | 47%                      |
| Vitis vinifera          | Eudicots         | Rosids                 | Vitales        | Vitales          | Vitaceae           | XM_010648242                    | XP_010654806                    | 46%                      | 45%                      |
| Solanum lycopersicum    | Eudicots         | Euasterids             | Lamiids        | Solanales        | Solanaceae         | XM_004245692                    | XP_004236461                    | 46%                      | 43%                      |
| Ipomoea nil             | Eudicots         | Euasterids             | Lamiids        | Solanales        | Convolvulaceae     | XM_019340312                    | XP_019159957                    | 48%                      | 42%                      |
| Mimulus guttatus        | Eudicots         | Euasterids             | Lamiids        | Lamiales         | Phrymaceae         | XM_012990426                    | XP_012856236                    | 45%                      | 41%                      |
| Olea europea            | Eudicots         | Euasterids             | Lamiids        | Lamiales         | Oleaceae           | XM_023026469                    | XM_022994362                    | 45%                      | 43%                      |
| Sesamum indicum         | Eudicots         | Euasterids             | Lamiids        | Lamiales         | Pedaliaceae        | XM_011083080                    | XM_020692503                    | 47%                      | 45%                      |
| Coffea arabica          | Eudicots         | Euasterids             | Lamiids        | Gentianales      | Rubiaceae          | XM_027226234                    | XM_027270435                    | 46%                      | 42%                      |
| Lactuca sativa          | Eudicots         | Euasterids             | Campanulid     | Asterales        | Asteraceae         | XP_023753693                    | XM_023894801                    | 45%                      | 37%                      |
| Helianthus annuus       | Eudicots         | Euasterids             | Campanulid     | Asterales        | Asteraceae         | XM_022149160                    | XM_022162388                    | 44%                      | 37%                      |
| Daucus carota           | Eudicots         | Euasterids             | Campanulid     | Apiales          | Apiaceae           | XM_017377544                    | XM_017362523                    | 44%                      | 41%                      |
| Camellia sinensis       | Eudicots         | Asterids               | Ericales       | Ericales         | Theaceaceae        | XM_028205791                    | XM_028195317                    | 49%                      | 48%                      |
| Spinacia oleracea       | Eudicots         | Core eudicots/Superast | Caryophyllales | Caryophyllales   | Amaranthaceae      | XM_022000275                    | XM_022007145                    | 41%                      | 42%                      |
| Nelumbo nucifera        | Basal eudicots   |                        |                | Proteales        | Nelumbonaceae      | XP_010259014                    | XP_010241626                    | 46%                      | 46%                      |
| Papaver somniferum      | Basal eudicots   |                        |                | Ranunculales     | Papaveraceae       | XM_026602809                    | XM_026587879                    | 40%                      | 36%                      |
| Aquilegia coerulea      | Basal eudicots   |                        |                | Ranunculales     | Ranunculaceae      | Aqcoe7G079000 (Phytosome)       | Aqcoe7G382900 (Phytosome)       | 46%                      | 42%                      |
| Elaeis guineensis       | Monocots         | Commelinids            |                | Arecales         | Arecaceae          | XM_010921594                    | XP_010928340                    | 44%                      | 34%                      |
| Phoenix dactylifera     | Monocots         | Commelinids            |                | Arecales         | Arecaceae          | XM_008788847                    | XM_026804442                    | 44%                      | 34%                      |
| Ananas comosus          | Monocots         | Commelinids            |                | Poales           | Bromeliaceae       | Aco011729, Phytosome            | XM_020246879                    | 39%                      | 25%                      |
| Oryza sativa            | Monocots         | Commelinids            |                | Poales           | Poaceae            | XP_025878546                    | XM_015755361                    | 35%                      | 21%                      |
| Brachypodium distachyon | Monocots         | Commelinids            |                | Poales           | Poaceae            | XM_024460675                    | XP_003576910                    | 35%                      | 20%                      |
| Zea mays                | Monocots         | Commelinids            |                | Poales           | Poaceae            | NP_001130869                    | XP_008649809                    | 36%                      | 21%                      |
| Setaria italica         | Monocots         | Commelinids            |                | Poales           | Poaceae            | XM_004953314                    | XP_004956307                    | 35%                      | 21%                      |
| Sorghum bicolor         | Monocots         | Commelinids            |                | Poales           | Poaceae            | XM_002452752                    | XP_002441305                    | 36%                      | 21%                      |
| Laurelia sempervirens   | Magnoliids       |                        |                | Laurales         | Atherospermataceae | gnl onekp WAIL_scaffold_2020264 | gnl onekp WAIL_scaffold_2068545 | 46%                      | 48%                      |
| Austrobaileya scandens  | Basal angiosperm | ANA                    |                | Austrobaileyales | Austrobaileyaceae  | gnl onekp FZIL_scaffold_2015050 | ?                               | 46%                      | N/A                      |
| Nymphaea colorata       | Basal angiosperm | ANA                    |                | Nymphaeales      | Nymphaeaceae       | XM_031628012                    | XM_031628356                    | 40%                      | 31%                      |
| Amborella trichopoda    | Basal angiosperm | ANA                    |                | Amborellales     | Amborellaceae      | No                              | No                              | N/A                      | N/A                      |

Color coding according to order/clade is the same as in Fig. 5

**Supplementary Table 2. Primers used in this study.**

| Construct/Purpose                                                                           | Primer name<br>(restriction enzyme)        | Sequence (5' to 3'; restriction enzyme recognition sites are underlined) |
|---------------------------------------------------------------------------------------------|--------------------------------------------|--------------------------------------------------------------------------|
| <i>INP2pr:INP2 ORF</i><br>( <i>INP2</i> promoter and <i>INP2</i> ORF fragments)             | INP2pr-IF-F<br>( <i>SacI</i> )             | ACAAAAGCTGGAGCTCGCTGTGATCTTCTTTGCTCTTC                                   |
|                                                                                             | INP2pr-IF-R<br>( <i>Bam</i> HI)            | <u>GGATCCTGC</u> CACTCAAATCCTAAAATGC                                     |
|                                                                                             | INP2-ORF-IF-F<br>( <i>Bam</i> HI)          | GAGTGTGCAGGATCCATGAGATTACAAGAGTTGGTTC                                    |
|                                                                                             | INP2-stop-SpeI-R<br>( <i>SpeI</i> )        | GGAA <u>ACTAGIT</u> TCAACTAGATGATCCTGATCC                                |
| <i>INP2pr:gINP2</i><br>(Fragment composed of <i>INP2</i> genic + ~0.5kb downstream regions) | INP2-ORF-IF-F<br>( <i>Bam</i> HI)          | GAGTGTGCAGGATCCATGAGATTACAAGAGTTGGTTC                                    |
|                                                                                             | gINP2-SpeI-R<br>( <i>SpeI</i> )            | GGAA <u>ACTAGIT</u> TGCTGTATGGCGCGGGTTATC                                |
| <i>INP2pr:H2B-RFP</i><br>( <i>H2B-RFP</i> fragment)                                         | H2BRFPinfAF<br>( <i>AgeI</i> )             | ATCCCCGGGTACCGGTGAATTCATGGCGAAGGCAGATAAGAAACC                            |
|                                                                                             | H2BRFPinfAR<br>( <i>SpeI</i> )             | AGCGTACCGGACTAGTTTAGGCGCCGGTGGAGTGGCGGC                                  |
| <i>INP2pr:gSIINP2</i><br>( <i>SIINP2</i> genomic fragment)                                  | BamHI-SIINP2-BF<br>( <i>Bam</i> HI)        | GGAAGGATCCATGAAGCGGCCTTCTTCTCTG                                          |
|                                                                                             | SpeI-SIINP2-AR<br>( <i>SpeI</i> )          | GGAA <u>ACTAGIT</u> CTTTTCTAAAGCCGAACGGTAAAC                             |
| Genotyping for <i>SIINP1</i> transgene                                                      | 2-SI-F                                     | GGCGACTCAGAATCCGAAATTGAC                                                 |
|                                                                                             | Sly INP1-R- <i>NcoI</i><br>( <i>NcoI</i> ) | GGAACCATGGCTAATTCCAAGAACAACCTTGTCAAATTGAC                                |
| Genotyping for <i>SIINP2</i> transgene                                                      | AD23                                       | TTTGTCTTCCTGCAACGTAACAAAGGAAAATCTATACTCGAAGATGAAGAC                      |
|                                                                                             | AD8                                        | CTCTTCGATGCGTATCTCGTTGATCAATTGGGGCAATGCCAC                               |
| CAPS marker for <i>inp1-1</i> (mutant allele cut with <i>SacI</i> )                         | 22600-DF                                   | ccatttagacaagggcttg                                                      |
|                                                                                             | 22600-DR                                   | AACTTGATACGACGAGACC                                                      |
| <i>dCAPS</i> marker for <i>inp2-1</i>                                                       | At1g15320-BF                               | GAGAGATCTCACCAACACGAATC                                                  |

|                                                                                                     |                                        |                                                         |
|-----------------------------------------------------------------------------------------------------|----------------------------------------|---------------------------------------------------------|
| (mutant allele cut with<br>AccI)                                                                    |                                        |                                                         |
|                                                                                                     | AD402                                  | CGCAATGCTGTTCTGTTCTTGCCTC                               |
| <i>SIINP2</i> ORF-pGEM-T-<br>Easy<br>(subcloning <i>SIINP2</i> ORF<br>into pGEM-T-Easy with<br>IVA) | AD19<br>( <i>Bam</i> HI)               | CAACGCGTTGGGGGATCCATGAAGCGGCCTTCTT<br>CTCTG             |
|                                                                                                     | AD16<br>( <i>Spe</i> I)                | CCGGCCGCCATGACTAGTCTACTTAAGTGGGCTA<br>CCACCAGAC         |
|                                                                                                     | AD17<br>( <i>Bam</i> HI)               | <u>GGATCCCCCAACGCGTTGGATGC</u>                          |
|                                                                                                     | AD14<br>( <i>Spe</i> I)                | <u>ACTAGTCATGGCGGCCGGGA</u>                             |
| <i>SIINP2</i> ORF-pGEM-T-<br>Easy<br>(subcloning <i>SIINP2</i> ORF<br>into pGEM-T-Easy with<br>IVA) | pGEM-INP2-<br>IF-F<br>( <i>Bam</i> HI) | ATCCAACGCGTTGGGGGATCCATGAGATTACAAG<br>AGTTGGTTCT        |
|                                                                                                     | INP2-pGEM-<br>IF-R<br>( <i>Spe</i> I)  | CTCCCGGCCGCCATGACTAGTTCAACTAGATGAT<br>CCTGATCCCT        |
| 1- <i>At</i> INP2 <sup>SIN</sup>                                                                    | AD19<br>( <i>Bam</i> HI)               | CAACGCGTTGGGGGATCCATGAAGCGGCCTTCTT<br>CTCTG             |
|                                                                                                     | AD20                                   | AAATCCATTCTCTTCACTAGAATTGACATCAACGT<br>GATGAGTTCC       |
|                                                                                                     | AD17<br>( <i>Bam</i> HI)               | <u>GGATCCCCCAACGCGTTGGATGC</u>                          |
|                                                                                                     | AD18                                   | AGTGAAGAGAATGGATTGAAGAACCAAAC                           |
| 2- <i>At</i> INP2 <sup>Slacid</sup>                                                                 | AD23                                   | TTTGTCTTCCTGCAACGTAACAAAGGAAAATCTAT<br>ACTCGAAGATGAAGAC |
|                                                                                                     | AD24                                   | TGATATATTACTAGCAGCTGTGCTGATTCTCTCGA<br>AATCGATGATC      |
|                                                                                                     | AD21                                   | ACGTTGCAGGAAGACAAACC                                    |
|                                                                                                     | AD22                                   | GCTGCTAGTAATATATCATCTAAAAGATCTCATGC                     |
| 3- <i>At</i> INP2 <sup>Slmid</sup>                                                                  | AD27                                   | GATGATCTGGAGAGAGAACCCTGTAATTTGCAAAA<br>CAGTACAAAATTGG   |
|                                                                                                     | AD28                                   | TTCAATCAGTTCATCGAGTGCCCATCTTGCTTTTA<br>GCTGTTTCTC       |
|                                                                                                     | AD25                                   | TTCTCTCTCCAGATCATCCAGGAAAG                              |
|                                                                                                     | AD26                                   | CTCGATGAACTGATTGAAGAACAGCTGAG                           |
| 4- <i>At</i> INP2 <sup>SIDOG1</sup>                                                                 | AD3                                    | CTAAAATCCAGGTGGGAAGTGGATGGACTTATCG<br>AAGAAGAACTC       |
|                                                                                                     | AD4                                    | GAAGGAGGGGTTTTGAGCGGCTAAGTATTGAAGA<br>AGATCCAGGATTG     |
|                                                                                                     | AD1                                    | TTCCACCTGGATTTTAGCTCTTTGTC                              |
|                                                                                                     | AD2                                    | GCTCAAACCCCTCCTTCTCTC                                   |
| 5- <i>At</i> INP2 <sup>SILCR</sup>                                                                  | AD7                                    | CTTGTCCGCATTCTGGCACATTCATCTGGGCTTT<br>CAAATCTCTAC       |
|                                                                                                     | AD8                                    | CTCTTCGATGCGTATCTCGTTGATCAATTGGGGC<br>AATGCCAC          |
|                                                                                                     | AD5                                    | TGCCAGAATGCGGACAAGGTC                                   |

|                              |                                        |                                                         |
|------------------------------|----------------------------------------|---------------------------------------------------------|
|                              | AD6                                    | GAGATACGCATCGAAGAGGCCGTTA                               |
| 6-AtINP2 <sup>SICTR</sup>    | AD11                                   | CTCTCTCAGCTTTTACGTGAGTTACGAATCGAGG<br>AGGCGGTGA         |
|                              | AD12                                   | CTGGTGTATGGCGTCTTGAATTCCAGCAAAAGCA<br>ACCAAAACTC        |
|                              | AD9                                    | ACGTAAAAGCTGAGAGAGCACG                                  |
|                              | AD10                                   | CAAGACGCCATACACCAGTTTGG                                 |
|                              | AD15                                   | GTCGCATTTGCAGGGATTCAAGATTTGGTTCATC<br>AATGGGCTATG       |
| 7-AtINP2 <sup>SIC-tail</sup> | AD16<br>( <i>SpeI</i> )                | CCGGCCGCCATGACTAGTCTACTTAAGTGGGCTA<br>CCACCAGAC         |
|                              | AD13                                   | AATCCCTGCAAATGCGACCAC                                   |
|                              | AD14<br>( <i>SpeI</i> )                | ACTAGTCATGGCGGCCGGGA                                    |
|                              | pGEM-INP2-<br>IF-F<br>( <i>Bam</i> HI) | ATCCAACGCGTTGGGGGATCCATGAGATTACAAG<br>AGTTGGTTCT        |
| 1-SIINP2 <sup>AtN</sup>      | AD21                                   | ACGTTGCAGGAAGACAAACC                                    |
|                              | AD17<br>( <i>Bam</i> HI)               | GGATCCCCAACGCGTTGGATGC                                  |
|                              | AD23                                   | TTTGTCTTCCTGCAACGTAACAAAGGAAAATCTAT<br>ACTCGAAGATGAAGAC |
|                              | AD20                                   | AAATCCATTCTCTTCACTAGAATTGACATCAACGT<br>GATGAGTTCC       |
| 2-SIINP2 <sup>Atacid</sup>   | AD27                                   | GATGATCTGGAGAGAGAACCTGTAATTTGCAAAA<br>CAGTACAAAATTGG    |
|                              | AD18                                   | AGTGAAGAGAATGGATTTGAAGAACCAAAC                          |
|                              | AD25                                   | TTCTCTCTCCAGATCATCCAGGAAAG                              |
|                              | AD24                                   | TGATATATACTAGCAGCTGTGCTGATTCTCTCGA<br>AATCGATGATC       |
| 3-SIINP2 <sup>Atmid</sup>    | AD3                                    | CTAAAATCCAGGTGGGAAGTGGATGGACTTATCG<br>AAGAAGAACTC       |
|                              | AD22                                   | GCTGCTAGTAATATATCATCTAAAAGATCTCATGC                     |
|                              | AD1                                    | TTCCACCTGGATTTTAGCTCTTTGTC                              |
|                              | AD28                                   | TTCAATCAGTTCATCGAGTGCCCATCTTGCTTTTA<br>GCTGTTTCTC       |
| 4-SIINP2 <sup>AtDOG1</sup>   | AD27                                   | GATGATCTGGAGAGAGAACCTGTAATTTGCAAAA<br>CAGTACAAAATTGG    |
|                              | AD26                                   | CTCGATGAACTGATTGAAGAACAGCTGAG                           |
|                              | AD5                                    | TGCCAGAATGCGGACAAGGTC                                   |
|                              | AD2                                    | GCTCAAACCCCTCCTTCTCTC                                   |
| 5-SIINP2 <sup>AtLCR</sup>    | AD9                                    | ACGTAAAAGCTGAGAGAGCACG                                  |
|                              | AD4                                    | GAAGGAGGGGTTTTGAGCGGCTAAGTATTGAAGA<br>AGATCCAGGATTG     |
|                              | AD11                                   | CTCTCTCAGCTTTTACGTGAGTTACGAATCGAGG<br>AGGCGGTGA         |
|                              | AD8                                    | CTCTTCGATGCGTATCTCGTTGATCAATTGGGGC<br>AATGCCAC          |

|                                                                         |                                       |                                                          |
|-------------------------------------------------------------------------|---------------------------------------|----------------------------------------------------------|
|                                                                         | AD15                                  | GTCGCATTTGCAGGGATTCAAGATTTGGTTCATC<br>AATGGGCTATG        |
|                                                                         | AD6                                   | GAGATACGCATCGAAGAGGCCGTTA                                |
|                                                                         | AD13                                  | AATCCCTGCAAATGCGACCAC                                    |
| 7-SIINP2 <sup>AtC-tail</sup>                                            | AD12                                  | CTGGTGTATGGCGTCTTGAATTCCAGCAAAAGCA<br>ACCAAAAACCTC       |
|                                                                         | AD14<br>( <i>SpeI</i> )               | <u>ACTAGTCATGGCGGCCGGA</u>                               |
|                                                                         | AD10                                  | CAAGACGCCATACACCAGTTTGG                                  |
|                                                                         | INP2-pGEM-<br>IF-R<br>( <i>SpeI</i> ) | CTCCCGGCCGCCATG <u>ACTAGTTCAACTAGATGAT</u><br>CCTGATCCCT |
| gRNA sequence for <i>INP2</i><br>CRISPR construct in<br>pHEE401E vector | Oligo-01-F-<br>INP2-T1                | ATTGAGACTTGTACGAACTGTGG                                  |
|                                                                         | Oligo-R-INP2-<br>T1                   | AAACCCACAGTTCGTACAAGTCT                                  |
| 35Spr:nYFP- <i>AtINP1</i>                                               | AD17-BHL<br>( <i>PacI</i> )           | CCCTTAATTAACATGCCTTTCTCTTTCTTCTCC                        |
|                                                                         | AD18-BHL<br>( <i>XbaI</i> )           | GCGTCTAGAAATTGGGCAAAGAAAGAATCTC                          |
| 35Spr:cYFP- <i>AtINP2</i>                                               | AD469<br>( <i>PacI</i> )              | CCCTTAATTA <del>AA</del> AATGAGATTACAAGAGTTGGTT          |
|                                                                         | AD470<br>( <i>XbaI</i> )              | 5'-GCGTCTAGAACTAGATGATCCTGATCCCTT                        |
| <i>AtINP1</i> -pDONR207                                                 | AD326                                 | AAAAAGCAGGCTAGAAAATGCCTTTCTCTTTC                         |
|                                                                         | AD488                                 | AGAAAGCTGGGTAGAGATTATTGGGCAAAGAA                         |
|                                                                         | AD122                                 | GGGACAAGTTTGTACAAA AAA GCA GGC T                         |
|                                                                         | AD123                                 | GGGACCACTTTGTACAAGAAAGCTGGGT                             |
| <i>AtINP2</i> -pDONR207                                                 | AD370                                 | AAAAAGCAGGCTGATCCATGAGATTACAAGAG                         |
|                                                                         | AD489                                 | AGAAAGCTGGGTAAAGCTCACTAGATGATCCT                         |
|                                                                         | AD122                                 | GGGACAAGTTTGTACAAAAAAGCAGGCT                             |
|                                                                         | AD123                                 | GGGACCACTTTGTACAAGAAAGCTGGGT                             |
