# Supplementary material
Source: PubMed Central journal article supplement (PMC8292223)

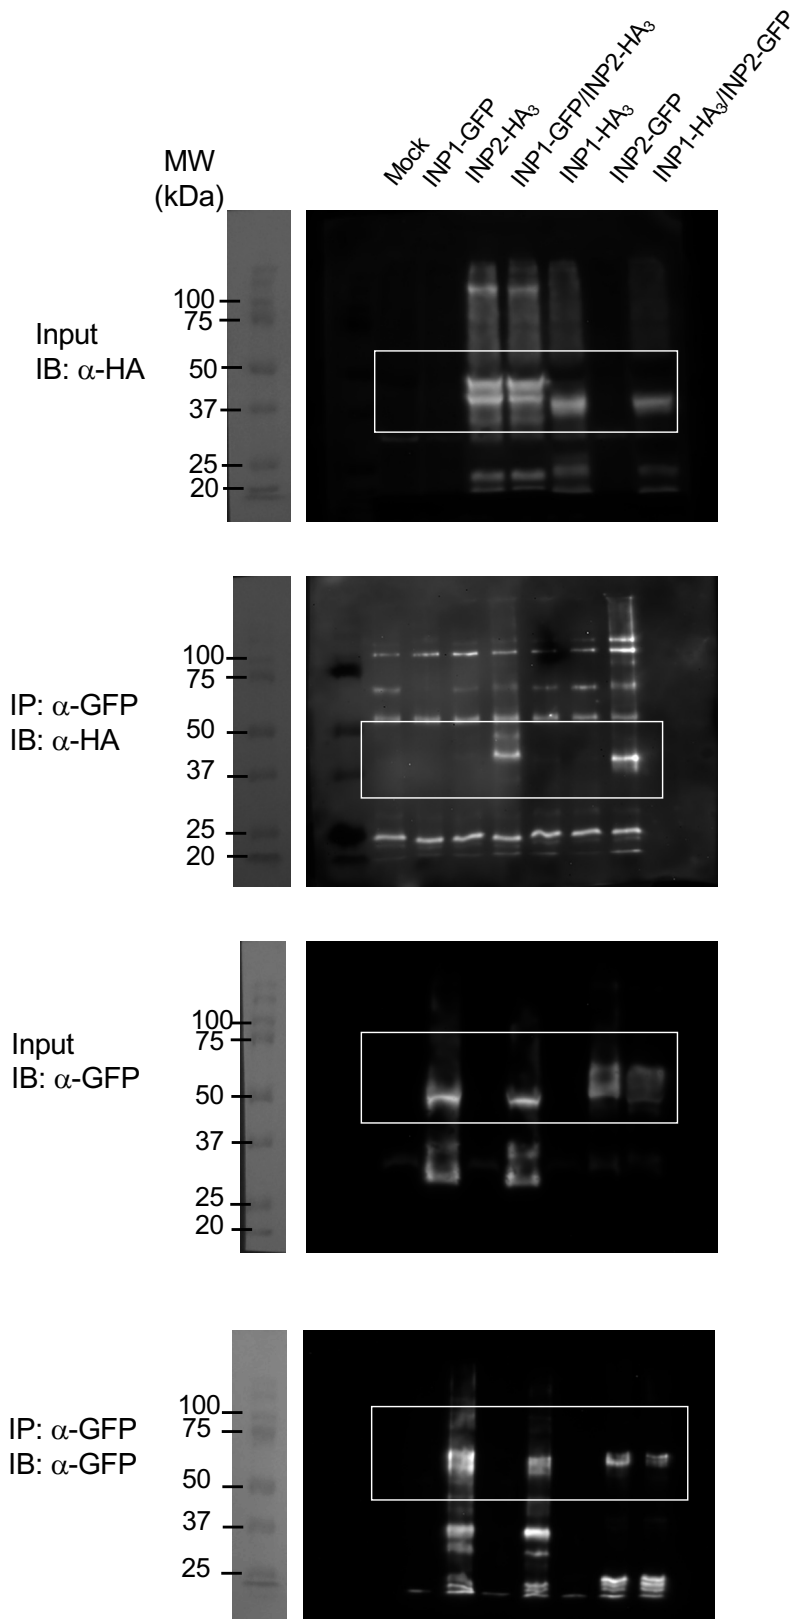

Source data: Fig. 4c

Supplement: NIHMS1708618-supplement-Lee_Source_data_Fig4c.pdf [file NIHMS1708618-supplement-Lee_Source_data_Fig4c.pdf]
